# Supplementary material
Source: PubMed Central journal article supplement (PMC3111310)
Supplement: 1019289108_pnas.201019289SI.pdf [file 1019289108_pnas.201019289SI.pdf]

# Supporting Information

Myers et al. 10.1073/pnas.1019289108

**Fig. S1.** ETD MS/MS spectra of the O-GlcNAcylated peptides identified in this study. Peptide sequence and site assignment of the HexNAc mass modification are assigned based on Protein Prospector results. Charged reduced species and common neutral losses (1) are not labeled.

[http://msf.ucsf.edu/personal\\_pages/myers/Myers\\_2011\\_Figure\\_S1.pdf](http://msf.ucsf.edu/personal_pages/myers/Myers_2011_Figure_S1.pdf)

1. Fällth M, et al. (2008) Analytical utility of small neutral losses from reduced species in electron capture dissociation studied using SwedECD database. *Anal Chem* 80:8089–8094.

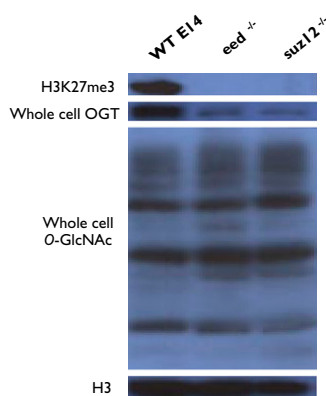

**Fig. S2.** Whole-cell lysate analysis of H3K27me3, OGT, O-GlcNAc, and H3 in ESC mutants for *eed* or *suz12*.

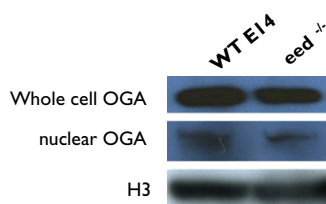

**Fig. S3.** Analysis of whole-cell and nuclear lysates for the O-GlcNAc hydrolase OGA/NCOAT/MGEA5 (OGA) in WT and *eed*<sup>-/-</sup> mutant ESCs.

**Table S1. All O-GlcNAc modified peptides identified in this study**

| Gene name   | Accession no. | O-GlcNAc peptides                                                             | Modified residue             |
|-------------|---------------|-------------------------------------------------------------------------------|------------------------------|
| Agf1        | Q8K2K6        | SSSADFGTF <b>TS(HexNAc)</b> QSHQTASTVSK                                       | T301 or S302                 |
| Atf7ip      | Q7TT18        | NSSTTAAPL <b>GT(HexNAc)</b> TLAVQAVPTAHISIVQATR                               | T902 or T903                 |
| Bnc2        | Q2TBA4        | ATS <b>(HexNAc)</b> GAATPVIASK                                                | S437                         |
| Bptf        | A2A654        | QTV <b>VS(HexNAc)</b> S <b>(HexNAc)</b> TENC*AR                               | S1742 and S1743              |
| Bptf        | A2A654        | <b>S(HexNAc)</b> TVTTTTTTVTK                                                  | S1750                        |
| Bptf        | A2A654        | <b>ST(HexNAc)</b> VTTTTTTVTK                                                  | T1751                        |
| Bptf        | A2A654        | STV <b>T(HexNAc)</b> TT <b>(HexNAc)</b> TTTTVTK                               | T1754 and T1756              |
| Bptf        | A2A654        | STV <b>TT(HexNAc)</b> T <b>(HexNAc)</b> TTTTVTK                               | T1755 and T1756              |
| Bptf        | A2A654        | STV <b>TT(HexNAc)</b> TTTTV <b>T(HexNAc)</b> K(heavy)                         | T1755 and T1760              |
| Bptf        | A2A654        | <b>T(HexNAc)</b> VI <b>TE</b> VTTMTSTVATESK                                   | T1710 or T1713               |
| Bptf (frag) | A2A653        | IVAVNVPAT <b>(HexNAc)</b> QGGMVQVQQK                                          | T225                         |
| C1orf88     | Q9D9W1        | VP <b>TST(HexNAc)</b> KGYAIGAR                                                | T82 or S83 or T84            |
| Cdk12       | Q14AX6        | <b>TS(HexNAc)</b> TLLSQTNSQPVVQVSMK                                           | T588-T590                    |
| Cdk13       | Q69ZA1        | TENQHVP <b>TTS(HexNAc)</b> SSLTDPHAGVK                                        | T1286 or S1287               |
| Cnot2       | Q8C5L3        | SLSQGTQLPSHV <b>PT(HexNAc)</b> TGVPTMSLHTPPSPSR                               | T113                         |
| Cnot2       | Q8C5L3        | SLSQGTQLPSHV <b>PT(HexNAc)</b> MSLHTPPSPSR                                    | T118                         |
| Dido1       | Q8C9B9        | ILSSLKPG <b>ST(HexNAc)</b> STVTAP <b>T(HexNAc)</b> TAAITTTASPVTAATSK          | T1280 and T1287 or T1288 mix |
| Ebp         | P70245        | Ac- <b>T(HexNAc)</b> TNTVPLHPYWPR                                             | T2                           |
| Egr1        | P08046        | AMVETS <b>(HexNAc)</b> YPSQTR                                                 | S117                         |
| Elf2        | Q9JHC9        | SPT <b>T(HexNAc)</b> T <b>(HexNAc)</b> APVSAAAAAPR                            | T375 and T376                |
| Emsy        | Q8BMB0        | I <b>IS(HexNAc)</b> SNIVSGTTTK                                                | S520                         |
| Emsy        | Q8BMB0        | IT <b>FT(HexNAc)</b> KPSTQTNTTTQK                                             | T228                         |
| Emsy        | Q8BMB0        | IT <b>FTKPS(HexNAc)</b> TQTTNTTTQK                                            | S231                         |
| Emsy        | Q8BMB0        | IT <b>FTKPSQ(HexNAc)</b> TNTTTQK                                              | T234 or T235                 |
| Emsy        | Q8BMB0        | L <b>VT(HexNAc)</b> TPTGTQATYTRPTVSPSLGR                                      | T465                         |
| Emsy        | Q8BMB0        | TITVP <b>VS(HexNAc)</b> GSPK                                                  | S200                         |
| Emsy        | Q8BMB0        | <b>TT(HexNAc)</b> SGSITTVPK                                                   | T499 and S500 mix            |
| Emsy        | Q8BMB0        | VII <b>V(HexNAc)</b> T <b>(HexNAc)</b> SPSSTFVNILSK                           | T246 and T247                |
| Ep400       | Q8CHI8        | LASPVAP <b>GLT(HexNAc)</b> TSGGSAPAQVVHTQQR                                   | T2594 or T2595               |
| Ep400       | Q8CHI8        | LASPVAP <b>GLT(HexNAc)</b> APAQVVHTQQR                                        | S2599                        |
| Gata2b      | Q5JP02        | <b>S(HexNAc)</b> ISQSISSGQK                                                   | S585                         |
| Hcf1        | B1AUX1        | AP <b>V(HexNAc)</b> VTSLPASVR                                                 | T515                         |
| Hcf1        | B1AUX1        | IPP <b>SS(HexNAc)</b> APTIVLSPVAGTTIVK <b>T(HexNAc)</b> VAVTPGTTTLPATVK       | S563 and T579                |
| Hcf1        | B1AUX1        | IT <b>(HexNAc)</b> VAPGALER                                                   | T1148                        |
| Hcf1        | B1AUX1        | L <b>VTVP(HexNAc)</b> VSAVKPA <b>V(HexNAc)</b> TLVVK                          | T861 and T870                |
| Hcf1        | B1AUX1        | L <b>VTPV(HexNAc)</b> VSAVKPA <b>V(HexNAc)</b> TLVVK                          | T861                         |
| Hcf1        | B1AUX1        | QPETY <b>HT(HexNAc)</b> YTTNTPTTTR                                            | T1238                        |
| Hcf1        | B1AUX1        | QPETY <b>HTYTTNTPTT(HexNAc)</b> TR                                            | T1246                        |
| Hcf1        | B1AUX1        | RT <b>T(HexNAc)</b> NTPTVVR                                                   | T1139                        |
| Hcf1        | B1AUX1        | SGT <b>VTVAAQQAQV<b>V(HexNAc)</b>T(HexNAc)</b> VVGGVTK                        | T651 and T652                |
| Hcf1        | B1AUX1        | SPI <b>ITTT(HexNAc)</b> KVMTSGTGAPAK                                          | T801                         |
| Hcf1        | B1AUX1        | <b>T(HexNAc)</b> QGVPAVLK                                                     | T480                         |
| Hcf1        | B1AUX1        | <b>T(HexNAc)</b> VAVTPGTTTLPATVK                                              | T579                         |
| Hcf1        | B1AUX1        | TAAAQ <b>VGTS(HexNAc)</b> V <b>S(HexNAc)</b> S <b>(HexNAc)</b> AANTSTRPIITVHK | S620 and S622 and S623       |
| Hcf1        | B1AUX1        | TAAAQ <b>VGTS(HexNAc)</b> V <b>SS(HexNAc)</b> AANTSTRPIITVHK                  | S620 and S623                |
| Hcf1        | B1AUX1        | TIPMSA <b>IT(HexNAc)</b> QAGATGVTSPPGK                                        | T779                         |
| Hcf1        | Q61191        | VMT <b>SGT(HexNAc)</b> GAPAK                                                  | T808                         |
| Hcf1        | B1AUX1        | VTGP <b>QAT(HexNAc)</b> TGTPLVTRMPASQAGK                                      | T495                         |
| Hprt1       | A8MSU4        | VIGGDDLSTL <b>TGKS(HexNAc)</b> R                                              | S129                         |
| Jmjd1c      | Q69ZK6        | HSVPQSLPQSN <b>YFTLS(HexNAc)</b> NSVVNEPR                                     | S911                         |
| Jmjd1c      | Q69ZK6        | NSPSPWL <b>HQPTPV<b>TS(HexNAc)</b></b> ADGIGLLSHIPVRPSSAEPHRPHK               | T728 or T731 or S732         |
| Jmjd1c      | Q69ZK6        | SV <b>VS(HexNAc)</b> QAVAQAK                                                  | S1250                        |
| Kdm3b       | Q6ZPY7        | VEHSPFSS <b>FVSQASGS(HexNAc)</b> SSATSVTSK                                    | S460 or S461                 |
| Kiaa1310    | A2RSY1        | <b>SSSS</b> EGGG <b>T(HexNAc)</b> ASTTPSVASSATPNAIHTLQSR                      | Between S699 and T707        |
| Kiaa1310    | A2RSY1        | V <b>P(HexNAc)</b> TITLTLR                                                    | T858                         |
| Kiaa1551    | Q5DTW7        | IST <b>T(HexNAc)</b> VVGSANPTNEVHVK(heavy)                                    | T491                         |
| Kiaa1551    | Q5DTW7        | NNQL <b>PY<b>T(HexNAc)</b></b> QSLQSK                                         | T40                          |
| Kiaa1551    | Q5DTW7        | QYSY <b>LPAT(HexNAc)</b> T <b>(HexNAc)</b> SLQVK                              | T232 and T233                |
| Kiaa1551    | Q5DTW7        | QYSY <b>LPAT(HexNAc)</b> T <b>SLQVK</b>                                       | T232 and T233 mix            |
| Kiaa1551    | Q5DTW7        | YENQH <b>VQNAQ<b>VS(HexNAc)</b></b> K                                         | S291                         |
| Lman1       | Q9D0F3        | RGAG <b>T(HexNAc)</b> PGQPQGVSQQLD <b>TVVK</b>                                | T385                         |
| Mafk        | Q60675        | VA <b>TT(HexNAc)</b> SVITIVK                                                  | T133 or T143                 |
| Med15       | Q924H2        | C* <b>M<b>TS(HexNAc)</b></b> RLQLPDK                                          | T761 or S762                 |
| Myb         | P06876        | TPAI <b>KRS(HexNAc)</b> ILESSPR                                               | S454                         |
| NCoR1       | Q60974        | RTP <b>V<b>S(HexNAc)</b></b> YQNTISR                                          | S1496                        |
| NCoR1       | Q60974        | SVQC* <b>VC*<b>T(HexNAc)</b></b> S <b>(HexNAc)</b> SALPSGK                    | T1899 and S1900              |
| NCoR2       | Q9WU42        | GSPV <b>TT(HexNAc)</b> REPTPR                                                 | T1531 or T1532               |
| Nfrkb       | Q6P1J4        | IQTV <b>PASHLQ<b>GT(HexNAc)</b></b> ASGSSK                                    | T1270                        |
| Nfrkb       | Q6P1J4        | QVPV <b>NTVV<b>TS(HexNAc)</b></b> QSGKLPTR                                    | S1172                        |
| Nup53       | Q8R4R6        | <b>S(HexNAc)</b> ISGSPVGMEMR                                                  | S53                          |
| Nup53       | Q8R4R6        | AS <b>TS(HexNAc)</b> DYQVISDR                                                 | S297                         |
| Nup98       | Q68G59        | LP <b>IS(HexNAc)</b> ASHSSK                                                   | S426                         |
| Nup153      | Q80WR0        | FG <b>IPS(HexNAc)</b> SSSGLS <b>QTLTSTGNFK</b>                                | S898 or S899                 |

Table S1. Cont.

| Gene name | Accession no. | O-GlcNAc peptides                                                          | Modified residue        |
|-----------|---------------|----------------------------------------------------------------------------|-------------------------|
| Nup153    | Q80WR0        | QQEPV <b>TS</b> (HexNAc)TSLVFGK                                            | S1102                   |
| Nup153    | Q80WR0        | <b>S</b> (HexNAc)VSVTPFTYK                                                 | S1046                   |
| Nup153    | Q80WR0        | SGFNFGTLDT(HexNAc)K                                                        | T1044                   |
| Nup153    | Q80WR0        | VDSPALQPTT(HexNAc) <b>T</b> (HexNAc)SSIVYTRPAISTFSSSGIEYGESLK              | T627 and T628           |
| Nup188    | Q6ZQH8        | AQRPS(HexNAc)TTTTTTTTALATPAGC*SSK                                          | S1522                   |
| Nup214    | Q80U93        | AAPGS(HexNAc)GTSTFSFAPPSK                                                  | S513                    |
| Nup214    | Q80U93        | FTAVAS(HexNAc)SAPVHSSTSTPSVLPFSSSPKPTASGPLSHPTPLPASSSSMPLK                 | S589 or S590            |
| Nup214    | Q80U93        | GGGFFSGLGGKPS(HexNAc)QDAANKNPFSSAGGGFGSTAAPNTSNLFGNSGAK                    | S1889 or 1899           |
| Nup214    | Q80U93        | HGAPGPSHT(HexNAc)VAAPQAAAAAALRR                                            | T1091                   |
| Nup214    | Q80U93        | SSASVTGEPPLYPTGS(HexNAc)DSSR                                               | S504                    |
| Nup214    | Q80U93        | VGQAEDSTKPV <b>S</b> (HexNAc)K                                             | S1362                   |
| Phc3      | Q8CHP6        | SAGQT(HexNAc)QSLTIC*HNK                                                    | T238                    |
| Phf21a    | Q6ZPK0        | FTPTTLPT <b>S</b> (HexNAc)QNSIHPVR                                         | S286                    |
| Pogz      | Q8BZH4        | RPGVT(HexNAc)GENSNEVAK                                                     | T310                    |
| Pogz      | Q8BZH4        | VT(HexNAc)SSIPVFDLQDGGRR                                                   | T358                    |
| Prdx6     | O08709        | LKLSILYPAT(HexNAc)TGR                                                      | T152                    |
| Qser1     | A2BIE1        | PTDYYVYPT <b>S</b> (HexNAc)PSLESC*DEGFQHQEK                                | T1077 or S1078 or S1080 |
| Qser1     | A2BIE1        | <b>TS</b> (HexNAc)QGTVPATALAFER                                            | S105                    |
| RanBP2    | Q9ERU9        | ALGTN <b>TS</b> (HexNAc)TAPNHTLR                                           | T1306 and S1307 mix     |
| RanBP2    | Q9ERU9        | SVFTT(HexNAc)AASELANK                                                      | T1138                   |
| Rbbp7     | Q5JP02        | Ac-DDHT(HexNAc)VC*LWDINAGPK                                                | T4                      |
| Rbm14     | Q8C2Q3        | AQPSVS(HexNAc)LGAAAYR                                                      | S244                    |
| Rbm14     | Q8C2Q3        | AQPSVS(HexNAc)LGAPYR                                                       | S280                    |
| Rprd2     | Q3UY82        | EKPVEKPAV <b>S</b> (HexNAc) <b>T</b> (HexNAc)GVPTK                         | S103 and T104           |
| Rprd2     | Q6NXI6        | EKPVEKPAV <b>S</b> (HexNAc)TGVPTK                                          | S103                    |
| Rprd2     | Q6NXI6        | SIFSSQSTLAAPAGHPPT <b>S</b> (HexNAc)GVEK(heavy)                            | S1110                   |
| Sal4      | Q8BX22        | LPHAS(HexNAc)VPSAASPLSSGLTSFTLKPQDTR                                       | S299 or S302            |
| Sap130    | Q8BIH0        | AQSPVIT <b>T</b> (HexNAc) <b>T</b> (HexNAc)AAHAADSTLSRPTLSIQHPPSAAISQRPQQR | T284 and T285           |
| Sap130    | Q8BIH0        | IT(HexNAc)LPSHPALGTPK                                                      | T320                    |
| Sap30bp   | Q02614        | KGTT(HexNAc)NATATSTSTASTAVADAQK                                            | T232 or T233            |
| Sin3a     | Q60520        | VS(HexNAc)KPSQLQAHTPASQQTPLPPYASPR                                         | S251                    |
| Snbo1     | Q689Z5        | FIQT(HexNAc)TANTRPSVSAPAVR                                                 | T124                    |
| Sox2      | P48432        | <b>S</b> (HexNAc)EASSPPVVTSSSHSR                                           | S248                    |
| Sox2      | P48432        | SEASSPPVVT(HexNAc)SSSHSR                                                   | T258                    |
| Sp2       | Q9D2H6        | <b>S</b> (HexNAc)STTTTTPVQSGANVVK                                          | S186                    |
| Spen      | Q62504        | TDRPSLEKPEPIHLSV <b>T</b> (HexNAc)PVTQGGTVK                                | T2896                   |
| Spen      | Q62504        | TDRPSLEKPEPIHLSV <b>T</b> (HexNAc)QGGTVK                                   | T2899                   |
| Taf4a     | A2AC70        | QVS(HexNAc)QAQTTVQPTTLQQR                                                  | S123                    |
| Taf6      | Q62311        | TT(HexNAc)LTITQPRPTLTLQAPQPGPR                                             | T49                     |
| Tcf20     | Q9EPQ8        | <b>T</b> (HexNAc)EPSKSPGSLR                                                | T725                    |
| Tet1      | D0VLQ4        | VSIT(HexNAc)GSADVK                                                         | T535                    |
| Tle4      | Q04727        | <b>T</b> (HexNAc)DAPTPGNSSTPGLRPVPGKPPGVDPPLASSLR                          | T340                    |
| Trim33    | Q99PP7        | QHSNPGHAGFPV <b>S</b> (HexNAc)AHNPINPTSPITATMANANR                         | S350                    |
| Trnc6a    | Q3UHK8        | LWSPGSVT <b>TS</b> (HexNAc)LAHELWK                                         | T1646 or S1647          |
| Vim       | Q3TWW0        | TYSLGSLRP <b>S</b> (HexNAc)R                                               | S49                     |
| Yeats2    | Q3TUF7        | QEPGEAPHV <b>ST</b> (HexNAc)TGAASQSAFFQYVTVK                               | S600 and T601 mix       |
| Yeats2    | Q3TUF7        | QEPGEAPHV <b>ST</b> (HexNAc)GAASQSAFFQYVTVK                                | T602                    |
| Ylpm1     | Q9R0I7        | QALLPTPV <b>S</b> (HexNAc)FGSTPPSPYHPPQSEQVNSKPLNK                         | S636                    |
| Zfx3      | Q15911        | NKNFQHPLV <b>S</b> (HexNAc)TANLIGPGHSFYGK                                  | S353                    |
| Zfp281    | Q3U063        | VKT(Phospho)PT(HexNAc)SQSYR                                                | T888                    |
| Zfp281    | Q3U063        | VKTPT <b>S</b> (HexNAc)QSYR                                                | S889                    |
| Zfp281    | Q3U063        | STNAGFTLGHGFQFV <b>S</b> (HexNAc)LSSPLHNHTLFPEK                            | S691                    |
| Zfr       | Q88532        | AGYS(HexNAc)QGATQYTAQQAR                                                   | S195                    |
| Znf318    | Q99PP2        | TVIAHT(HexNAc)SPWTPVTTSTQTK                                                | T1185 and S1186 mix     |

The gene name and accession number are given. Black denotes the unambiguous assignment of the O-GlcNAc moiety (mass addition of a HexNAc). Red denotes that the exact site is not assigned but can be localized to one of the red-colored residues. Green and blue indicate a mixture of positional isomers, wherein the corresponding colors in the annotated mass spectrum (Fig. S1) identify both positional isomers as O-GlcNAcylated. Ac, acetylation; \*, Carbamido-methylation.

**Table S2. All O-GlcNAc–modified peptides identified in the SILAC analyses, along with PRC2/WT ratios, as described in the main text**

| Gene name       | O-GlcNAc–modified peptides identified from SILAC analyses             | eed <sup>-/-</sup> /WT<br>SILAC ratios | SD,<br>n = 3 |
|-----------------|-----------------------------------------------------------------------|----------------------------------------|--------------|
| Agfg1           | SSSADFGTFST(SHexNAc)QSHQTASTVSK                                       | 0.67                                   |              |
| Atrx            | IC(Carbamidomethyl)GS(HexNAc)GLNS(Phospho)DM(Oxidation)MENNKEEGASTSEK | 0.29                                   |              |
| Bnc2            | ATS(HexNAc)GAATPVIASK                                                 | 0.27                                   |              |
| Bptf            | QTVVS(HexNAc)S(HexNAc)TENC(Carbamidomethyl)AR                         | 1.0                                    | 0.1          |
| Bptf            | S(HexNAc)TVTTTTTVTK                                                   | 0.52                                   | 0.03         |
| Bptf            | STVTTT(HexNAc)TTT(VT(HexNAc)K                                         | 0.12                                   |              |
| Bptf            | T(HexNAc)VITEVTTMTSTVATESK                                            | 1.00                                   |              |
| Bptf            | TVIT(HexNAc)EVT(HexNAc)TMTSTVATESK                                    | 0.27                                   | 0.02         |
| Bptf (fragment) | IVAVNVPAT(HexNAc)QGGMVQVQK                                            | 0.91                                   |              |
| C1orf88 homolog | VPTST(HexNAc)KGYAIGAR                                                 | 0.92                                   | 0.08         |
| Cdk12           | TS(HexNAc)TLSSQNTSQQPVQVSMK                                           | 2.42                                   |              |
| Cnot2           | SLSQGTQLPSHVPTT(HexNAc)GVPTMSLHTPPSPSR                                | 1.12                                   |              |
| Dido1           | ILSSLKPGST(HexNAc)STVTAPTT(HexNAc)AAITTTASPVAATSK                     | 1.12                                   |              |
| Egr1            | AMVETS(HexNAc)YPSQTR                                                  | 2.03                                   |              |
| Emsy            | IIS(HexNAc)SNIVSGTTK                                                  | 0.06                                   |              |
| Emsy            | ITFT(HexNAc)KPSTQTTNTTQK                                              | 1.37                                   | 0.09         |
| Emsy            | TITVPVS(HexNAc)GSPK                                                   | 0.45                                   |              |
| Emsy            | TTS(HexNAc)GSIITVVPK                                                  | 1.1                                    | 0.3          |
| Ep400           | LASPVAPGTLTSSGG(SHexNAc)APAQVVHTQQR                                   | 0.59                                   |              |
| HcfC1           | APVT(HexNAc)VTSLPASVR                                                 | 1.72                                   |              |
| HcfC1           | IPPSSAPT(VLSPAGT(HexNAc)TIVKTAVT(HexNAc)PGTTTLPATVK                   | 0.47                                   |              |
| HcfC1           | IT(HexNAc)VAPGALER                                                    | 0.97                                   | 0.06         |
| HcfC1           | LVTVPVT(HexNAc)VS(VKPAVTTLVVK                                         | 6.93                                   |              |
| HcfC1           | QPETYHT(HexNAc)YTTNTPTTTR                                             | 1.2                                    | 0.3          |
| HcfC1           | QPETYHTYTTNTPTT(HexNAc)R                                              | 6.67                                   |              |
| HcfC1           | SGTVTVAQQAQVVT(HexNAc)T(HexNAc)VVGVTK                                 | 0.78                                   |              |
| HcfC1           | SPITIT(HexNAc)KVMSTSGTGAPAK                                           | 1.0                                    | 0.1          |
| HcfC1           | T(HexNAc)VAVTPGTTTLPATVK                                              | 1.44                                   | 0.08         |
| HcfC1           | TAAAQVGT(SHexNAc)VS(HexNAc)S(HexNAc)AANTSTRPIITVHK                    | 0.33                                   |              |
| HcfC1           | TAAAQVGT(SHexNAc)VSS(HexNAc)AANTSTRPIITVHK                            | 0.76                                   | 0.09         |
| HcfC1           | TAAAQVGT(SHexNAc)VSS(HexNAc)AANTSTRPIITVHK                            | 1.77                                   |              |
| HcfC1           | TIPMSAIT(HexNAc)QAGATGVTSPPGIK                                        | 0.9                                    | 0.3          |
| HcfC1           | VMTSGT(HexNAc)GAPAK                                                   | 0.77                                   |              |
| HcfC1           | VTGPQAT(HexNAc)TGTPLVMTMRPASQAGK                                      | 0.70                                   |              |
| Jmjd1           | NSPSPWLHQTPVT(HexNAc)SADGIGLLSHIPVRPSSAEPHRPHK                        | 0.47                                   |              |
| Kiaa1310        | VPT(HexNAc)TITLTLR                                                    | 13.87                                  |              |
| Kiaa1551        | ISTT(HexNAc)VVGANPTNEVHVK                                             | 0.41                                   |              |
| Kiaa1551        | NNQLPTYT(HexNAc)QSLQSK                                                | 0.59                                   |              |
| Kiaa1551        | YENQHVQNAQPVS(HexNAc)K                                                | 0.4                                    | 0.3          |
| Lman1           | RGAGT(HexNAc)PGQPGQVSSQQLDVTVK                                        | 4.9                                    | 0.2          |
| MafK            | VATT(HexNAc)SVITIVK                                                   | 1.13                                   |              |
| Myb             | TPAIKRS(HexNAc)ILESSPR                                                | 6.45                                   |              |
| NCoR2           | GSPVTT(HexNAc)REPTPR                                                  | 0.85                                   | 0.03         |
| Nfrkb           | IQTVPASHLQQGT(HexNAc)ASGSSK                                           | 0.38                                   |              |
| Nfrkb           | QVPVNTTVVSTS(HexNAc)QSGKLPTR                                          | 0.46                                   |              |
| Nup53           | ASTS(HexNAc)DYQVISDR                                                  | 0.45                                   |              |
| Nup53           | S(HexNAc)ISGSPVGVMEMR                                                 | 0.50                                   |              |
| Nup153          | FGIPSSSSGLS(HexNAc)QTLTSTGNFK                                         | 0.28                                   |              |
| Nup153          | QQEPVTS(HexNAc)TSLVFGK                                                | 0.41                                   |              |
| Nup153          | S(HexNAc)VSVTPFTYK                                                    | 0.40                                   |              |
| Nup214          | AAPGS(HexNAc)GTSTFSFAPPSK                                             | 0.45                                   |              |
| Nup214          | HGAPGPSHT(HexNAc)VAAPQAAAAAALRR                                       | 0.28                                   |              |
| Nup214          | SSASVTGEPPLYPTGS(HexNAc)DSSR                                          | 0.72                                   |              |
| Nup214          | VGQAEDSTKPV(SHexNAc)K                                                 | 0.67                                   |              |
| Phc3            | SAGQT(HexNAc)QSLTIC(Carbamidomethyl)HNK                               | 5.10                                   |              |
| Phf21a          | FTPTTLPTS(HexNAc)QNSIHPVR                                             | 1.31                                   |              |
| Pogz            | RPGVT(HexNAc)GENSNEVAK                                                | 0.34                                   |              |
| Qser1           | DSTQVS(HexNAc)NGVLPQK                                                 | 0.96                                   |              |
| Qser1           | TS(HexNAc)QGTVPALAFER                                                 | 0.65                                   |              |
| RanBP2          | SVFTT(HexNAc)AASELANK                                                 | 0.8                                    | 0.6          |
| Rbm14           | AQPSVS(HexNAc)LGAPYR                                                  | 0.29                                   | 0.03         |
| Rprd2           | EKPVEKPAVS(HexNAc)T(HexNAc)GVPTK                                      | 0.6                                    | 0.1          |

Table S2. Cont.

| Gene name | O-GlcNAc-modified peptides identified from SILAC analyses | eed <sup>-/-</sup> /WT<br>SILAC ratios | SD,<br>n = 3 |
|-----------|-----------------------------------------------------------|----------------------------------------|--------------|
| Sap30bp   | KGT(HexNAc)TTNATATSTASTAVADAQK                            | 1.41                                   | 0.03         |
| Sap130    | AQSPVIT(HexNAc)T(HexNAc)AAHAADSTLSRPTLSIQHPPSAAISQRPAQSR  | 0.82                                   |              |
| Sap130    | IT(HexNAc)LPSPALGTPK                                      | 0.21                                   |              |
| Sin3a     | VS(HexNAc)KPSQLQAHTPASQQTPLPPYASPR                        | 0.69                                   |              |
| Snbo1     | FIQT(HexNAc)TANTRPSVSAPAVR                                | 0.45                                   |              |
| Sp2       | S(HexNAc)STTTTPVQSGANVVK                                  | 0.37                                   |              |
| Spn       | TDRPSLEKPEPIHLSVST(HexNAc)PVTQGGTVK                       | 1.03                                   | 0.06         |
| Taf4a     | QVS(HexNAc)QAQTTVQPTTLQR                                  | 0.33                                   |              |
| Taf6      | TT(HexNAc)LTITQPRPTLTLSQLAPQGPGR                          | 2.23                                   |              |
| Tet1      | VSIT(HexNAc)GSADVK                                        | 0.83                                   |              |
| Tle4      | T(HexNAc)DAPTPGSNSTPGLRPVPGKPPGVDPLASSLR                  | 1.2                                    | 0.7          |
| Trim33    | QHSNPGHAGPFPVVS(HexNAc)AHNPINPTSPTTATMANANR               | 0.91                                   |              |
| Yeats2    | QEPGEAPHVSTT(HexNAc)GAASQSAFPQYVTVK                       | 0.65                                   | 0.02         |
| Zfhx3     | NKNFQHPLVS(HexNAc)TANLIGPGHSFYGK                          | 2.85                                   |              |
| Zfp281    | STNAGFTLGHGFQFVS(HexNAc)LSSPLHNHTLFPEK                    | 0.46                                   |              |
| Zfp281    | VKT(Phospho)PT(HexNAc)SQSYR                               | 0.47                                   | 0.02         |
| Zfp281    | VKTPTS(HexNAc)QSYR                                        | 0.6                                    | 0.2          |
| Zfr       | AGYS(HexNAc)QGATQYTAQQAR                                  | 0.38                                   |              |

SDs are reported if the particular glycopeptide was identified between biological replicates.

Table S3. O-GlcNAcylated peptides identified from this study that overlap with those reported by Wang et al. (1) and Chalkley et al. (2)

| Gene name | Modification position<br>in human, unless noted<br>(UniProt) | UniProt ID<br>[Wang et al. (1)] | Modified peptide sequence from Wang<br>et al. (1) overlapping with this study | Also reported in<br>Chalkley et al. (2) |
|-----------|--------------------------------------------------------------|---------------------------------|-------------------------------------------------------------------------------|-----------------------------------------|
| HcfC1     | T495                                                         | P51610                          | VTGPQAT(HexNAc)TGTPLVTRMPASQAGK                                               |                                         |
| HcfC1     | S563                                                         | P51610                          | IPPS5(HexNAc)APTVLVSPAGTTIVK                                                  |                                         |
| HcfC1     | T779                                                         | P51610                          | TIPM-oxSAIIT(HexNAc)QAGATGVTSPPGIK                                            |                                         |
| HcfC1     | T800                                                         | P51610                          | SPITIIIT(HexNAc)K                                                             |                                         |
| HcfC1     | T808                                                         | P51610                          | VMTSGT(HexNAc)GAPAK                                                           |                                         |
| HcfC1     | T861                                                         | P51610                          | LVTVPV(HexNAc)VSVAVKPAVTTLVVK                                                 |                                         |
| Emsy      | S236                                                         | Q7Z589                          | TITVPVS(HexNAc)GSPK                                                           |                                         |
| Emsy      | T501                                                         | Q7Z589                          | LVT(HexNAc)TPTGTQATYTRPTVSPSIGR                                               |                                         |
| Emsy      | (T534/T535)                                                  | Q7Z589                          | (TT)(HexNAc)SGSIITVVPK                                                        | X                                       |
| Emsy      | S557                                                         | Q7Z589                          | IISS(HexNAc)NIVSGTTTK                                                         |                                         |
| Nup153    | S908                                                         | P49790                          | FGVS(HexNAc)SSSSGPSQTLTSTGNFK                                                 |                                         |
| Nup153    | S909                                                         | P49790                          | FGVSS(HexNAc)SSSSGPSQTLTSTGNFK                                                |                                         |
| Bptf      | S1749 & T1753                                                | Q12830                          | S(HexNAc)TVTT(HexNAc)TTTTVTK                                                  |                                         |
| Rbm14     | S244                                                         | Q96PK6                          | AQPSVS(HexNAc)LGAAAYR                                                         |                                         |
| Rbm14     | S280                                                         | Q96PK6                          | AQPSVS(HexNAc)LGAPYR                                                          |                                         |
| Nfrkb     | T1273                                                        | Q6P4R8                          | IQTVPASHLQGGT(HexNAc)ASGSSK                                                   |                                         |
| Zfr       | S195                                                         | Q96KR1                          | AGYS(HexNAc)QGATQYTAQQTR                                                      |                                         |
| Qser1     | (T104/S105)                                                  | Q2KHR3                          | (TS)(HexNAc)QGTVPALAFER                                                       |                                         |
| Kiaa1310  | T860                                                         | Q9P2N6                          | VPTT(HexNAc)ITLTLR                                                            |                                         |
| NCoR1     | S1487                                                        | O75376                          | TPVS(HexNAc)YQNTMSR                                                           | X                                       |
| NCoR2     | (T1569/T1570)                                                | Q9Y618                          | GSPV(TT)(HexNAc)REPTPR                                                        |                                         |
| Taf4a     | S528                                                         | O00268                          | QVS(HexNAc)QAQTTVQPSATLQR                                                     |                                         |
| Zfp281    | S891                                                         | Q9Y2X9                          | TPTS(HexNAc)QSYR                                                              |                                         |

Red indicates differences in site assignments between studies.

1. Wang Z, et al. (2010) Extensive crosstalk between O-GlcNAcylation and phosphorylation regulates cytokinesis. *Sci Signal*, 10.1126/scisignal.2000526.
2. Chalkley RJ, Thalhammer A, Schoepfer R, Burlingame AL (2009) Identification of protein O-GlcNAcylation sites using electron transfer dissociation mass spectrometry on native peptides. *Proc Natl Acad Sci USA* 106:8894-8899.
